# Supplementary material for: Metformin protects against myocardial ischemia-reperfusion injury and cell pyroptosis via AMPK/NLRP3 inflammasome pathway
Source: publisher site journal article supplement (doi:10.18632/aging.202143), 2020-11-21
Supplement: Supplementary file [file aging-v12i23-202143-supplementary-material-SD2.pdf]

## Supplementary Figures

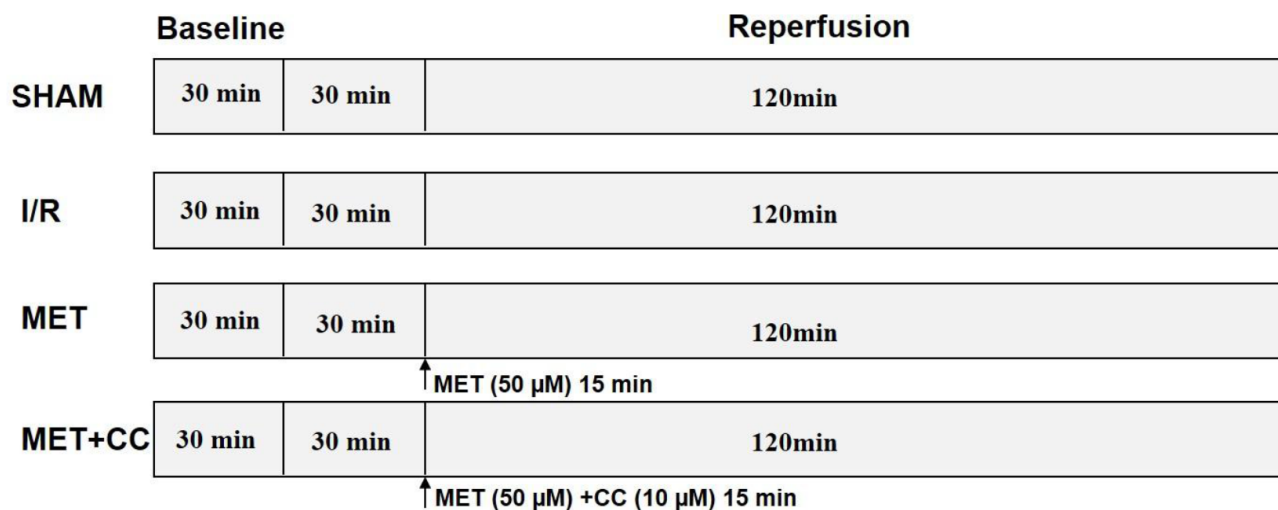

**Supplementary Figure 1. Schematic illustration of the experimental protocol in Langendoff IR model.** All the groups underwent the same surgical operation. (1) SHAM: rats were subjected to 3h continuous perfusion; (2) IR: rats received 30min equilibrium period, 30min ischemia period, followed by 2h reperfusion period; (3) MET: rat hearts were perfused with K-H solution saturated with 50  $\mu$ M metformin for 15 min besides ischemia/reperfusion; (4) MET+CC: rat hearts were perfused with K-H solution saturated with 50  $\mu$ M metformin combined with 10  $\mu$ M Compound C for 15 min besides ischemia/reperfusion.

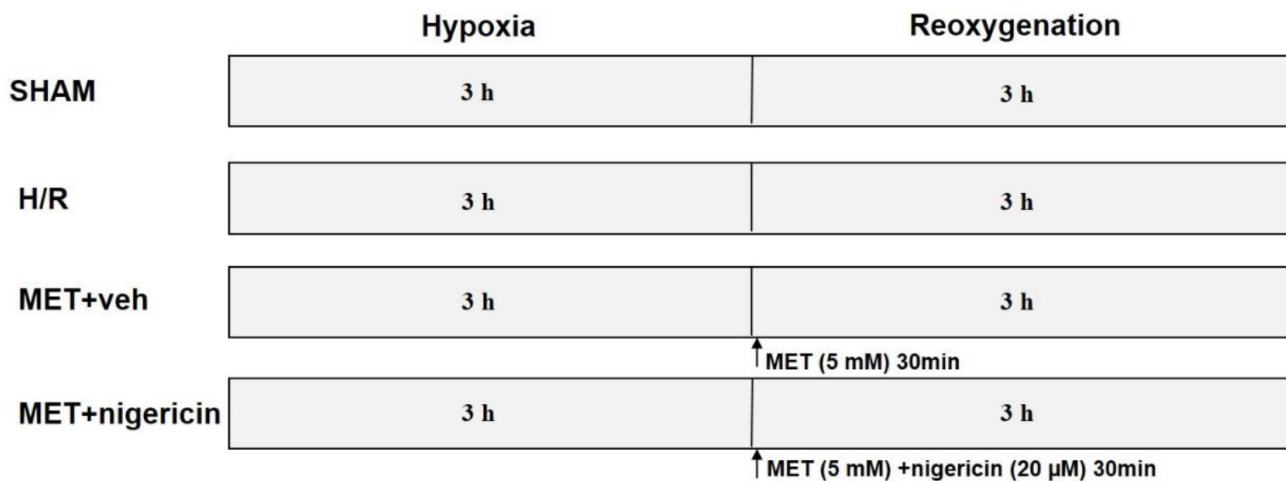

**Supplementary Figure 2. Schematic illustration of the experimental protocol in vitro H/R model.** Nigericin initially dissolved in ethanol and diluted with DMEM to a final concentration of 20  $\mu$ mol/l. (1) SHAM: neonatal rat ventricular myocytes (NRVMs) were subjected to 3h continuous oxygenation; (2) H/R: NRVMs received 3h hypoxia period, followed by 3h reoxygenation period; (3) MET+veh: NRVMs were subjected to 5 mM metformin for 30 min besides hypoxia/reoxygenation; (4) MET+nigericin: NRVMs were subjected to 5 mM metformin combined with 20  $\mu$ M nigericin for 30 min besides hypoxia/reoxygenation.
